# Supplementary material for: Qualität rettungsdienstlicher Verdachtsdiagnosen und Dringlichkeitsbeurteilungen
Source: Springer Nature journal article supplement (doi:10.1007/s10049-024-01409-z), 2024-11-13
Supplement: MOESM1 [file 10049_2024_1409_MOESM1_ESM.pdf]

**Zusatzmaterial zum Artikel** „Qualität rettungsdienstlicher Verdachtsdiagnosen und Dringlichkeitsbeurteilungen“ von Willis M, Henke, TJ, That S et al. (2024) in *Notfall+Rettungsmedizin*.

Artikel und ergänzendes Material finden Sie unter [www.springermedizin.de](http://www.springermedizin.de). Bitte geben Sie dort in der Suche den Titel des Artikels ein.

## Zusatzmaterial 1: Alle Fälle, die nicht bewertet werden konnten (n=24)

(Prüfer sind sich nicht einig)

| PZC                                                              | Klinische Diagnosen                                                                                                                                           |
|------------------------------------------------------------------|---------------------------------------------------------------------------------------------------------------------------------------------------------------|
| Synkope/Kollaps                                                  | Va. leichte Gastritis, Präsynkope DD im Rahmen der Schmerzen mit Panikattacke                                                                                 |
| Bronchitis/Pneumonie                                             | Sepsis bei a.e. Pneumonie, Respiratorische Insuffizienz Typ 1                                                                                                 |
| Thorax geschlossen/stumpf                                        | V.a. Exazerbierte COPD, Ausschluss relevante Herzinsuffizienz, Z.n. Sturz vor einer Woche                                                                     |
| sonstiger neurologischer Notfall                                 | Ausgeprägte Exsikkose, Synkope a.e. Aortenklappenstenose, V.a. ACS                                                                                            |
| Sonstige Gastroenteritis                                         | Va. Schub Morbus Crohn                                                                                                                                        |
| SAB                                                              | V.a. Meningitis                                                                                                                                               |
| unklare Bewusstlosigkeit                                         | AZ-Verschlechterung, Harnverhalt, erhöhte Entzündungswerte                                                                                                    |
| WS / Bandscheibe nicht traumatisch ohne neurologischen Ausfällen | Wurde mit Rückenschmerzen (Ausschluss Kauda Equina) weiterverlegt                                                                                             |
| Entbindung/Einsetzende Geburt > 36. SSW                          | GI in der 37+2 SSW (ET21.10.) mit I. BEL                                                                                                                      |
| Atemnot (unklar)                                                 | Synkope bei Exsikkose, Rippenserienfraktur, D-Dimere >35, Pneumonie rechts                                                                                    |
| Alkohol                                                          | Hyperglykämie bei C2 Intox                                                                                                                                    |
| septischer Schock                                                | Unklarer Infekt a.e. Pneumonie bei Immuntherapie bei ED Lungenkarzinom C2T4N2M1a                                                                              |
| sonstiger HNO Notfall                                            | Schwindel unklarer Genese bei subjektivem Kraftverlust rechts Bein DD Stroke DD Hörsturz rechts DD Vestibulocochleäre Störung                                 |
| Apoplex/TIA/Blutung < 6 h                                        | AZ-Verschlechterung auf Boden eines Harnverhalts bei vorbekannter Demenz, Z.n. Sturz, Mundwinkelasymmetrie rechts und Dysarthrie a.e. bei AZ-Verschlechterung |
| Hypertonie                                                       | TIA bei hypertensiver Krise                                                                                                                                   |
| erstmaliger Krampfanfall                                         | V.a. cerebrale Metastasen                                                                                                                                     |
| sonstiger neurologischer Notfall                                 | DD Komplex-fokale Anfälle, DD Ischämie, Ausschluss ACS und Aortendissektion                                                                                   |
| unklare Bewusstlosigkeit                                         | Hypoglykämie, V.a. Pneumonie/Aspiration linker Oberlappen                                                                                                     |
| tachykarde Rhythmusstörungen                                     | Akute Belastungsreaktion mit Palpitationen                                                                                                                    |
| Krampfanfall bei bekanntem Krampfleiden                          | Psychogene Anfälle                                                                                                                                            |
| sonstiger HNO Notfall                                            | Sinusbradykardie 35-40 bpm derzeit unklarer Genese, M. Meniere Schub mit Drehschwindel                                                                        |
| sonstiger neurologischer Notfall                                 | V.a. Neuropathia vestibularis links                                                                                                                           |
| Hypotonie                                                        | Pneumonie rechts basal, Exsikkose, akuter Harnwegsinfekt, RR bei Aufnahme 95/62                                                                               |
| unklares Fieber                                                  | V.a. Pneumonie rechts basal                                                                                                                                   |

## Zusatzmaterial 2: Häufigkeitsverteilung der PZC - Top 25

| PZC nach Häufigkeit sortiert - Stichprobe (n=1.150)    |                 |         | PZC nach Häufigkeit sortiert - Bundesweit* (n=2.328.447)       |                 |         |
|--------------------------------------------------------|-----------------|---------|----------------------------------------------------------------|-----------------|---------|
| PZC                                                    | Abs. Häufigkeit | Prozent | PZC                                                            | Abs. Häufigkeit | Prozent |
| Apoplex/TIA/Blutung < 6 h                              | 166             | 14,4%   | Extremitäten geschlossen                                       | 193967          | 8,3%    |
| Gesichts-/Kopfverletzung                               | 94              | 8,2%    | Internistischer Notfall, sonstiger                             | 123846          | 5,3%    |
| Extremitäten geschlossen                               | 85              | 7,4%    | Kopfverletzung                                                 | 111389          | 4,8%    |
| sonstiger internistischer Notfall                      | 52              | 4,5%    | Synkope / Kollaps                                              | 80608           | 3,5%    |
| Handverletzung                                         | 40              | 3,5%    | Schlaganfall / Blutung: < 24h oder unklar                      | 79805           | 3,4%    |
| Synkope/Kollaps                                        | 39              | 3,4%    | Bauchschmerzen                                                 | 76657           | 3,3%    |
| Apoplex/TIA/Blutung 6-24 h                             | 36              | 3,1%    | Hypertensiver Notfall / Krise                                  | 60638           | 2,6%    |
| Kopf SHT geschlossen                                   | 35              | 3,0%    | unklarer Brust - / Thoraxschmerz                               | 54079           | 2,3%    |
| Krampfanfall bei bekanntem Krampfleiden                | 27              | 2,3%    | Hüft - / Schenkelhalsfraktur                                   | 52587           | 2,3%    |
| Verletzungsmuster mit DGU Schockraum-Indikation Grad B | 26              | 2,3%    | Neurologischer Notfall, sonstiger                              | 47808           | 2,1%    |
| Wirbelsäulentrauma ohne neurologische Ausfälle         | 25              | 2,2%    | Bronchitis / Pneumonie                                         | 43310           | 1,9%    |
| Hypertonie                                             | 25              | 2,2%    | Obstruktion (Asthma / COPD)                                    | 43307           | 1,9%    |
| Alkohol                                                | 24              | 2,1%    | Gesichtsverletzung                                             | 42804           | 1,8%    |
| Schenkelhals                                           | 23              | 2,0%    | Rückenschmerzen, nicht traumatisch ohne neurologische Ausfälle | 40941           | 1,8%    |
| sonstige kombinierte Extremitätenverletzungen          | 22              | 1,9%    | Atemnot (unklar) / Atembeschwerden / ARI                       | 40727           | 1,7%    |
| sonstiger HNO Notfall                                  | 20              | 1,7%    | Intoxikation Alkohol                                           | 40679           | 1,7%    |
| sonstiger neurologischer Notfall                       | 20              | 1,7%    | Herzinsuffizienz                                               | 39780           | 1,7%    |
| sonstige kombinierte Verletzung                        | 19              | 1,7%    | Exsikkose                                                      | 39408           | 1,7%    |
| Apoplex/TIA/Blutung > 24h                              | 19              | 1,7%    | NSTEMI, instabile AP                                           | 38963           | 1,7%    |
| erstmaliger Krampfanfall                               | 18              | 1,6%    | Epileptischer Anfall (stattgehabt)                             | 38605           | 1,7%    |
| Extremitäten offen                                     | 17              | 1,5%    | SHT geschlossen                                                | 37962           | 1,6%    |

|                                                |    |      |                                                             |       |      |
|------------------------------------------------|----|------|-------------------------------------------------------------|-------|------|
| Epistaxis                                      | 17 | 1,5% | Akutes Abdomen<br>(nicht traumatisch)                       | 36001 | 1,5% |
| Mischintoxikation<br>Alkohol/Drogen/Medikament | 14 | 1,2% | Tachykardie                                                 | 34640 | 1,5% |
| Thorax geschlossen/stumpf                      | 13 | 1,1% | GI-Blutung                                                  | 34065 | 1,5% |
| Exsikkose                                      | 12 | 1,0% | Verl. der<br>Wirbelsäule ohne<br>neurologischen<br>Ausfälle | 30710 | 1,3% |

\*Die Daten beschränken sich auf die Bundesländer, die zwischen 2021-2023 Bundesweit einheitliche PZC verwendet haben (Bayern, Berlin, Brandenburg, Bremen, Mecklenburg-Vorpommern, Niedersachsen, Sachsen, Sachsen-Anhalt). Die Länder haben zu unterschiedlichen Zeiten auf bundeseinheitliche PZC umgestellt, weshalb nicht alle genannten Länder ab 2021 ausgewertet wurden.

Die Daten wurden freundlich zur Verfügung gestellt von der Firma Mainis IT-Service GmbH

### Zusatzmaterial 3: Alle Fälle, in denen wichtige Symptome/Verletzungen übersehen wurden (n=20) und potenzieller Patientenschaden entstand

(Bewertungssystem Kategorie 4)

| PZC                                             | Paraphrasierte klinische Hauptdiagnose                        |
|-------------------------------------------------|---------------------------------------------------------------|
| Handverletzung                                  | Mediale Schenkelhalsfraktur                                   |
| Gesichts-/Kopfverletzung                        | Polytrauma                                                    |
| Wirbelsäulentrauma mit neurologischen Ausfällen | Rippenserienfraktur mit Pneumothorax                          |
| sonstiger internistischer Notfall               | Hirnstamminfarkt, Kleinhirnininfarkt                          |
| sonstiger HNO Notfall                           | Hirnstamminfarkt                                              |
| Kopf SHT geschlossen                            | Kleinhirnininfarkt                                            |
| Kopfschmerz                                     | Subarachnoidalblutung                                         |
| Wirbelsäulentrauma ohne neurologische Ausfälle  | Hirnininfarkt mit akut aufgetretenem Schwindel                |
| Medikamente                                     | Vertebrobasilare Ischämie                                     |
| Apoplex/TIA/Blutung 6-24 h                      | Pneumokokken Meningitis                                       |
| Synkope/Kollaps                                 | Sepsis                                                        |
| Apoplex/TIA/Blutung < 6 h                       | Urosepsis                                                     |
| sonstiger gastroenterologischer Notfall         | Aspirationspneumonie, V.a. Lungenarterienembolie              |
| Extremitäten geschlossen                        | Exacerbierte COPD                                             |
| Apoplex/TIA/Blutung < 6 h                       | Dünndarmileus                                                 |
| (Bolos-) Aspiration                             | Akuter Myokardinfarkt mit EKG-Veränderung und Troponinanstieg |
| Gesichts-/Kopfverletzung                        | Akutes Coronarsyndrom                                         |
| Hypertonie                                      | Angina Pectoris bei V.a. Stentthrombose                       |
| Exsikkose                                       | Bradyarrhythmia absoluta bei Vorhofflimmern                   |
| Hypotonie                                       | Tachyarrhythmia absoluta bei Vorhofflattern 160/min           |

\*Der Übersichtlichkeit halber wird nur die führende klinische Diagnose genannt

## Zusatzmaterial 4: eMethode

### Datengrundlage

Da es für die Datenzusammenführung von IVENA-Daten und den Falldaten des KAS keine gemeinsame identifizierende Variable (z.B. Fallnummer) gab, wurde folgende Vorgehensweise gewählt: Zunächst wurde in Orbis die Fallübersicht aufgerufen. Unter „Fallstatus“ wurde AMBULANT und STATIONÄR ausgewählt. Unter „Falltyp“ wurden AKTUELLER FALL und ENTLASSENER FALL ausgewählt. In dem Feld „Aufnahmedatum“ wurde das entsprechende Datum aus IVENA übernommen. Anschließend wurde die Suche gestartet. Die nun angezeigten Fälle wurden nach „Alter“ sortiert und mit dem Patientenalter aus IVENA abgeglichen, es galt eine Toleranz von +/- 1 Jahr. Anschließend wurde die „Aufnahmeuhrzeit“ mit der „Eintreffuhrzeit“ aus IVENA abgeglichen. Es galt eine Toleranz von +/- 1h. Konnte ein Patient eindeutig zugeordnet werden, war die Suche erfolgreich abgeschlossen. Falls mehr als ein Patient oder kein Patient die Suchkriterien erfüllte, wurde der Fall ausgeschlossen (<10%).
